# Supplementary material for: Combined Administration of Curcumin and Chondroitin Sulfate Alleviates Cartilage Injury and Inflammation via NF-κB Pathway in Knee Osteoarthritis Rats
Source: Front Pharmacol. 2022 May 19;13:882304. doi: 10.3389/fphar.2022.882304 (PMC9161211; doi:10.3389/fphar.2022.882304)
Supplement: Supplementary file 2 [file Table1.XLSX]

## Sheet: Fig1.B
	Ctrl						Model						Cur						CS						CA
day1	0.49	0.43	0.3	-0.13	-0.2	-0.33	1.76	2.1	1.57	1.84	2.35	1.87	1.94	3.18	2.69	2.35	2.83	3.85	2.83	3.18	1.08	1.96	2.71	1.72	3.74	3.12	3.28	2.77	2.57	2.27
day4	0.82	0.45	0	0.05	0	0	3.25	3.33	3.87	3.67	3.9	3.45	2.49	2.21	3.21	3.78	3.35	3.13	3.34	3.08	2.59	3.23	2.98	3.11	2.32	2.16	2.81	2.93	2.72	3.72
day7	0.43	-0.18	-0.42	0.44	0.59	0.13	2.38	2.6	3.33	2.65	3.24	2.75	1.7	2.45	2.41	2.01	1.46	2.14	2.13	1.87	2.55	2.25	2.51	2.4	1.46	0.78	2.06	1.39	2.67	2.41
day14	-0.03	-0.58	0.31	0.69	0.21	-0.11	1.99	2.04	2.22	1.84	2.02	1.88	0.86	0.8	1.15	0.76	0.97	1.45	1.38	1.74	0.78	1.23	1.3	1.84	1.49	0.67	0.71	1.4	0.97	0.88

## Sheet: FIG1.C
Ctrl	Model	Cur	CS	CA
0	11	8	7	6
1	12	6	8	6
1	12	7	9	7
0	12	7	7	5
1	10	9	9	8

## Sheet: FIG2.C
Ctrl	Model	Cur	CS	CA
563.827	117.624	261.369	195.864	288.312
439.042	104	212.577	164.947	227.233
597.877	121.514	259.418	217.914	200.962
387.07	112.366	223.455	168.374	270.94

## Sheet: FIG3.B
Ctrl	Model	Cur	CS	CA
1481.43	933.02	1468.02	1100.28	1448.69
1369.86	923.22	1253.44	1234.17	1823.74
1495.3	923.59	1173.01	1266.77	2277.64
1442.92	937.39	1138.74	1098.84	2140.7

## Sheet: FIG4.A
Ctrl	Model	Cur	CS	CA
59.7081	80.5391	93.7709	69.0554	57.1589
75.8291	88.0842	72.6486	50.3609	92.4356
67.1616	81.7773	73.1639	65.9477	72.2601
60.766	80.3934	71.2658	67.2659	69.3556
64.4524	101.39	70.5963	59.6332	65.2263

## Sheet: FIG4.B
Ctrl	Model	Cur	CS	CA
248.001	513.227	391.253	338.056	134.577
308.418	452.361	295.367	189.674	267.38
202.326	234.131	527.476	266.265	212.473
145.026	484.728	135.717	579.343	167.264
233.941	499.236	305.261	205.19	148.21

## Sheet: FIG4.C
Ctrl	Model	Cur	CS	CA
29.35	37.6795	35.2865	35.5776	32.4674
36.025	37.4239	34.0722	31.5087	34.4415
36.4723	36.7351	35.1232	34.0225	30.9407
36.5575	38.2547	36.4865	32.091	32.8153
29.0802	38.0722	35.0166	35.0876	32.439

## Sheet: FIG4.D
Ctrl	Model	Cur	CS	CA
273.039	292.989	279.238	265.344	279.166
260.285	279.665	273.538	246.961	275.034
263.848	294.699	259.501	271.97	260
270.402	279.594	273.894	264.132	270.26
272.113	284.011	277.955	268.906	269.619

## Sheet: FIG5.A
Ctrl	Model	Cur	CS	CA
86.4801	76.7099	77.006	76.895	80.0036
84.6667	84.6667	81.0029	74.5265	80.0407
88.1824	84.8147	77.3391	76.5989	81.3359
88.8486	83.6674	74.0824	81.0769	86.258
90.884	88.5895	81.0769	83.2233	85.1848

## Sheet: FIG5.B
Ctrl	Model	Cur	CS	CA
8.83436	6.98971	9.20923	9.33097	9.2535
8.97845	7.00078	9.39369	9.6335	9.62796
8.10757	6.96942	9.88068	9.47117	9.78107
8.71631	6.68166	9.57262	8.28506	9.03214
8.10019	7.12622	9.48224	9.54495	9.17602

[truncated: 5 more sheets: FIG5.C, FIG5.D, FIG5.E, FIG5.F, Sheet7]
